# Supplementary material for: Comparing Neuroendocrine Recovery Between Surgical and Conservative Management in Pituitary Apoplexy Patients: A Propensity Score-Matched Analysis
Source: Research Square preprint supplement (doi:10.21203/rs.3.rs-4160609/v1), 2024-03-29
Supplement: Supplementary file 1 [file 075e65889081fcf367a0548c.xlsx]

## Sheet: Demographic-Pituitary-apoplexy
id	age	sex	com	ht	dm	ubt	hd	dvt	atm	kpt	fp	pr	ovp	vpo	hea	nv	vim	cnp	aoc	gcs	hyp	hemi	pbs	top	re	rpa	le	lpa	rpf	lpf	vis	c3p	c4p	c5p	c6p	pha	pht	phg	pdi	psp	pts	pw	pl	ph	tc	kno	wie	wii	sse
1	47	2	0	0	0	0	0	0	0	0	0	0	0	0	0	0	1	0	0	15	0	0	1	0		3		0.1	1	0	40	0	0	0	0	0	1	0	0	118.1	23	23	17	19	1	4	1	2	6.6
2	59	1	1	1	0	1	1		1	1	0	0	0	0	0	0	1	0	0	15	0	0	2	1	20/25+2	0.1	20/40	0.3	0	2	15	0	0	0	0	0	0	0	0	12	34	21	20	34	2	2	1	2	10.7
3	39	2	1	0	1	0	0	0	0	0	0	0	0	0	0	0	1	0	0	15	0	0	1	1	FC	2	FC	2	2	2	100	0	0	0	0	0	0	0	0	32.5	32	26	26	32	2	2	1	2	18.6
4	34	2	0	0	0	0	0	0	0	0	0	0	0	0	1	0	0	0	0	15	0	0	3	0	20/25	0.1	20/25	0.1	0	0	4	0	0	0	0	0	0	0	0	36.4	18	18	12	12	1	2	1	2	2.1
5	75	1	1	1	0	0	0	0	0	0	0	0	1	0	0	0	1	0	0	15	0	0	2		20/60	0.5	20/80	0.6	2	2	62	0	0	0	0	1	1	1	0	13.8	28	26	26	28	1	2	1	2	10.5
6	56	2	0	0	0	0	0	0	0	0	0	0	0	0	0	0	1	0	0	15	0	0	2	1	20/20	0	FC	2	2	2	50	0	0	0	0	0	0	0	0	24.3	33	18	18	33	2	0	1	2	16.7
7	35	1	0	0	0	0	0	0	0	0	0	0	0	0	1	0	1	1	0	15	0	0	1	0		1.3		0.1	1	0	35	1	0	0	1	1	0	1	0	5.2	35	35	24	28	2	3	1	2	11.2
8	55	2	1	0	0	0	0	0	0	0	0	0	0	0	1	0	0	0	0	15	0	0	3	0	20/25	0.1	20/25	0.1	0	0	4	0	0	0	0	1	1	1	0	54	17	15	13	17	1	2	1	2	8.9
9	53	1	0	0	0	0	0	0	0	0	0	0	0	0	0	0	1	0	0	15	0	0	2	0		1		0.8	1	1	39	0	0	0	0	0	0	1	0	19.5	40	22	24	40	2	2	1	4	23.8
10	76	2	1	0	0	1	1	0	1	0	0	0	1	0	0	0	1	0	0	15	0	0	2	1		0.1		0.3	2	2	32	0	0	0	0	0	1	1	0	63.6	23	17	23	22	1	2	1	2	16.3
11	63	1	1	1	0	0	0	0	0	0	0	0	0	1	1	0	1	0	1	14	0	0	1	0		1.1		1.1	2	2	107	0	0		0	1	1	1	0	3.9	29	20	20	29	1	3	1	4	7.9
12	59	1	1	1	0	0	0	0	0	0	0	0	0	0	0	0	1	0	0	15	0	0	2	1	20/25	0.1	20/200	1	2	2	47	0	0	0	0	0	0	0	0	15.7	32	25	27	32	1	2	1	2	11.3
13	56	2	1	1	1	0	0	0	0	0	0	0	0	0	0	0	1	0	0	15	0	0	2	1	20/80	0.6	Hm	2.3	2	2	87	0	0	0	0	0	0	1	0	59.3	44	40	20	44	3	2	2	3	21.2
14	57	1	1	0	0	0	0	0	1	0	0	0	0	0	0	1	0	0	0	15	0	0	2	1		0.1		0.1	0	0	4	0	0	0	0	1	1	0	0	3	21	21	11	12	1	1	1	2	7.3
15	73	1	1	1	0	0	0	0	1	0	0	0	0	0	0	0	1	0	0	15	0	0	3	0		0.4		0.2	2	2	42	0	0	0	0	1	1	1	0	8.9	19	19	15	13	1	2	1	2	13.4
16	36	2	0	0	0	0	0	0	0	0	0	0	0	0	1	0	1	0	0	15	0	0	1	1	20/70	0.6	20/200-2	1	0	2	62	1	0	0	2	1	0	0	0	3	25	25	17	21	1	3	1	2	8.2
17	74	1	0	0	0	0	0	0	0	0	0	0	0	0	1	0	1	0	0	15	0	0	3	1	20/50-1	0.4	20/50-1	0.4	2	2	47	0	0	0	0	1	1	1	0	8.8	27	20	27	25	1	1	1	2	10.5
18	75	1	1	1	0	0	0	0	0	1	0	0	0	0	1	0	1	0	0	15	0	0	2	1	No PL	3	No PL	3	3	3	100	0	0	0	0	1	0	1	0	31.5	49	31	36	49	3	1	2	3	34.7
19	49	1	0	0	0	0	0	0	0	0	0	0	0	0	1	0	1	0	0	15	0	0	2	1	20/32	0.2	20/25	0.1	0	1	13	0	0	0	0	1	1	1	0	54.8	19	19	15	13	1	1	1	2	8.7
20	79	1	1	1	0	0	0	0	0	0	0	0	1	0	1	1	1	0	0	15	0	0	3	1	15/200	1.1	20/50	0.4	2	2	64	0	0	0	0	1	1	1	0	2.8	22	18	16	22	1	0	0	2	0
21	41	2	1	1	1	0	0	0	1	0	0	0	0	0	0	1	1	0	0	15	0	0	2	1	20/40	0.3	15/200-2	1.1	0	2	45	0	0	0	0	0	0	0	0	18.1	22	22	21	18	1	0	1	2	11.7
22	64	1	1	1	0	0	0	0	0	0	0	0	0	0	1	0		1	0	15	0	0	2	1								2	0	0	0	1	1	1	0	1.6	30	30	30	25	2	2	1	2	15.3
23	54	2	1	1	0	0	0	0	0	0	0	0	0	0	0	0	1	0	0	15	0	0	2	1	20/25	0.1	20/20	0	1	0	7	0	0	0	0	0	0	0	0	8.3	16	13	16	13	1	0	1	2	4.3
24	47	2	1	0	0	0	0	0	0	0	0	0	0	0	1	1	1	0	0	15	0	0	1	0	20/30	0.2	20/25	1	1	1	24	0	0	0	0	0	0	0	0	138.4	29	27	29	19	1	3	1	2	21.7
25	57	2	1	1	1	0	0	0	1	0	0	0	0	0	1	1	1	1	0	15	0	1	1	0	20/200	1	20/200	1	2	2	97	2	2	1	1	1	1		0		28	16	22	28	1	2	1	4	13.1
26	32	1	0	0	0	0	0	0	0	0	0	0	0	0	1	1	1	0	0	15	0	0	1	1	20/50	0.4	No PL	3	2	3	62	0	0	0	0	1	1	1	0	336.9	42	42	32	29	3	2	2	2	28.3
27	57	2	0	0	0	0	0	0	0	0	0	0	0	0	1	0	1	1	0	15	0	0	3	0	20/25-1	0.1	20/20	0	2	2	24	0	0	0	0	0	0	0	0	8.5	18	18	10	14	1	1	1	2	13.1
28	51	2	1	1	0	0	0	0	0	1	0	0	1	0	0	0	1	0	0	15	0	0	0	1	no pL	3	20/25	0.1	3	2	45	0	0	0	0	0	0	0	0	26.8	45	27	3	45	3	3	2	3	24.5
29	74	2	1	1	0	0	0	0	1	0	0	0	0	1	0	0	0	0	1	10	0	0	1	0													1	1	0	10.4	49	47	36	49	3	2	3	2	41.6
30	52	1	0	0	0	0	0	0	0	0	0	0	0	0	1	0	0	0	0	15	0	0	2	1					0	0		0	0	0	0	1	1	1	0	24.5	18	15	18	15	1	0	1	2	11.1
31	69	2	1	0	0	0	0	0	0	0	0	0	0	0	1	1	1	1	0	15	0	0	2	0	20/32	0.2	20/32	0.2	2	2	37	0	0	0	1	1	0	0	0	5.3	20	18	16	20	1	2	1	2	15.1
32	60	1	0	0	0	0	0	0	0	1	0	0	0	0	0	0	1	0	0	15	0	0	2	1	20/32	0.2	20/25	0.1	1	0	13	0	0	0	0	1	1	1	0	45.7	23	23	18	15	1	2	0	2	0
33	23	1	0	0	0	0	0	0	0	0	0	0	0	0	0	0	1	0	0	15	0	0	1	0	20/200	1	20/40	0.3	2	2	57	0	0	0	0	1	1	1	0	14.3	42	34	32	42	3	3	2	2	29.4
34	47	2	0	0	0	0	0	0	0	0	0	0	0	0	1	0	1	0	0	15	0	0	2	0	20/20	0	20/25	0.1	2	2	24	0	0	0	0	0	0	0	0	20.5	29	23	19	29	1	2	1	2	16.3
35	54	1	0	0	0	0	0	0	0	0	0	0	0	0	0	0	0	0	0	15	0	0	2	1	20/20	0	20/20	0	0	0	0	0	0	0	0	1	0	0	0	21.5	23	23	23	16	1	1	1	2	10.8
36	45	1	1	0	0	0	0	0	0	0	0	0	0	0	1	1	1	0	0	15	0	0	2	0	20/120	0.8	PL	2.7	2	3	100	0	0	0	0	1	1		0		40	35	23	40	3	2	2	4	25.1
37	58	1	1	1	0	0	0	0	0	0	0	0	0	0	0	0	1	0	0	15	0	0	2	1	20/25	0.1	20/20	0	2	2	24	0	0	0	0	1	1	1	0	16.9	41	28	22	41	3	1	1	2	16.7
38	53	1	0	0	0	0	0	0	0	0	0	0	0	0	1	0	1	1	1	15	0	0	1	0			Hm	2.3				2	2	2	2	1	1	1	0	0.5	28	22	18	28	1	2	1	2	15.2
39	33	1	0	0	0	0	0	0	0	0	0	0	0	0	1	0	0	0	0	15	0	0	2	0	20/20	0	20/20	0	0	0	0	0	0	0	0	1	1	1	0	7.2	27	23	27	25	1	0	1	2	7.1
40	49	2	1	0	1	0	0	0	0	0	0	0	0	0	0	0	1	0	0	15	0	0	2	1	20/20	0	15/200	1.1	2	2	44	0	0	0	0	0	0	0	0	92	58	24	45	58	3	3	1	4	13.1
41	33	1	1	0	0	0	0	0	0	0	0	0	0	0	1	0	1	0	0	15	0	0	2	0	5/200	1.6	20/80	0.6	2	2	89	0	0	0	0	1	1	1	0	6	38	27	38	26	2	1	1	4	17.4
42	50	2	1	1	1	0	0	0	0	0	0	0	0	0	0	0	1	0	0	15	0	0	2	1	20/32	0.2	No pL	3	2	3	52	0	0	0	0	0	0	0	0	94.7	36	29	31	36	1	3	1	2	23.1
43	72	2	0	0	0	0	0	0	0	0	0	0	1	0	1	1	1	1	0	15	0	0	2	0	FC	2	20/200	1	3	2	100	1	0	0	0	1	0	0	0		26	20	16	26	1
44	48	2	1	0	0	0	0	0	0	0	0	0	0	0	1	1	0	0	0	15	0	1	1	0	20/25	0.1	20/25	0.1	0	0	4	0	0	0	0	1	0		0	80.8	35	25	29	35	2	3	1	2	14.9
45	75	2	1	1	0	0	0	0	0	0	0	0	1	0	0	0	1	0	1	15	0	0	2	0	Hm	2.3	20/200	1	3	2	100	0	0	0	0	1	1	1	0	11.9	45	38	24	45	3	3	2	4	20.7
46	59	1	1	0	1	0	0	0	1	1	0	0	0	0	0	0	1	0	0	15	0	0	2	1	20/50	0.4	20/63	0.5	2	2	43	0	0	0	0	1	1	1	0	83.8	22	22	16	14	1	2	1	2	9.1
47	51	2	1	0	0	0	0	0	0	0	0	0	0	0	1	1	1	1	0	15	0	0	2	0	20/120	0.8	20/80	0.6	2	2	77	2	0	0	0	1	1	1	0	4.4	25	20	25	20	1	3	1	4	15.7
48	31	2	0	0	0	0	0	0	0	0	0	0	0	0	1	0	1	0	1	11	0	0	1	0	5/200	1.6	10/200	1.3	2	2	100	0	0	0	0	0	1	0	0	12.3	40	30	40	34	3	3	1	2	17.8
49	28	2	0	0	0	0	0	0	0	0	0	0	0	0	0	0	1	0	0	15	0	0	1	0	FC	2	No PL	3	3	3	100	0	0	0	0		1		0	13.7	51	51	32	46	3	4	3	2	24.5
50	62	2	1	1	0	0	1	0	1	0	0	0	0	0	1	1	1	0	0	15	0	0	1	0	20/40	0.3	15/200	1.1	1	1	54	0	0	0	0	0	0	0	0	68.6	40	24	20	39	2	4	2	4	20.8
51	59	2	1	1	0	0	0	0	0	0	0	0	1	0	1	0	1	0	0	15	0	0	2	0	20/100	0.7	20/160	0.9	2	2	82	0	0	0	0	0	0	0	0	89.7	37	37	32	24	2	3	2	2	26.3
52	57	2	1	1	1	0	0	0	0	0	0	0	0	0	1	1	1	0	0	15	0	0	2	0	No PL	3	20/160	0.9	3	2	100	0	0	0	0	0	0	1	0	21.2	54	39	37	54	3	3	2	4	22.6
53	58	2	0	0	0	0	0	0	0	0	0	0	0	0	0	0	1	0	0	15	0	0	2	1	20/200	1	HM	2.3	2	2	100	0	0	0	0	0	0	0	0	31.7	42	36	37	42	3	2	2	2	22.8
54	72	1	1	0	1	0	0	0	0	0	0	0	0	0	1	1	1	0	0	15	0	0	2	0	5/200	1.6	No PL	3	3	3	100	0	0	0	0	1	1	1	0	7.2	36	21	29	36	2	3	2	4	17.2
55	32	1	0	0	0	0	0	0	0	0	0	0	0	0	1	0	0	1	0	15	0	0	2	1		0.1		0.1	0	0	4	0	0	0	1	0	0	0	0	22.4	22	20	20	22	1	2	1	2	3.7
56	52	2	0	0	0	0	0	0	0	0	0	0	0	0	0	0	1	0	0	15	0	0	2	1	20/20	0	20/200	1	2	2	42	0	0	0	0	0	0	0	0	18.8	34	20	34	17	3	3	2	2	21.2
57	76	1	0	0	0	0	0	0	0	0	0	0	1	0	0	0	1	0	0	15	0	0		0	HM	2.3	No PL	3	3	3	100	0	0	0	0	1	0	0	0	5.6	32	26	30	32	2	2	2	2	25.4
58	66	2	1	0	0	0	0	0	0	1	0	0	0	0	1	1	0	1	0	15	0	0	1	0	20/50	0	20/40	0	0	0	0	1	0	0	1	1	0		0	61.5	18	18	16	13	1	3	0	2	0
59	53	1	1	1	0	0	0	0	0	0	0	0	0	0	0	0	1	0	0	15	0	0	2	1	20/100	0.7	20/200	1	2	2	82	0	0	0	0	0	0	1	0	21	34	34	30	24	1	2	2	2	21.6
60	44	2	0	0	0	0	0	0	0	0	0	0	0	0	1	0	1	0	0	15	0	0	2	1	No PL	3	20/160	0.9	3	2	100	0	0	0	0	1	1	1	0	60.6	37	35	37	21	2	3	2	2	21.7
61	52	1	0	0	0	0	0	0	0	0	0	0	0	0	1	1		1	0	15	0	0	2	1	20/160	0.9	20/25	0.1	0	0	25	1	1	0	1		0	1	0	2.6	39	39	18	18	2	4	1	2	14.5
62	37	2	1	1	1	0	0	0	0	0	0	0	0	0	0	0	1	0	0	15	0	0	2	1	10/200-2	1.3	20/100	0.7	2	2	92	0	0	0	0	0	1	0	0	82.1	37	21	23	37	1	1	2	2	26.4
63	48	1	1	1	0	0	0	0	0	0	0	0	0	0	0	0	0	0	1	15	0	0	2	0		0		0	2	2	22	0	0	0	0	0	0	0	0	38.3	22	21	22	16	1	1	1	2	12.8
64	53	2	1	0	0	0	0	0	0	0	0	0	0	0	0	0	1	0	0	15	0	0	1	0	No PL	3	5/200	1.6	3	2	100	0	0	0	0	0	1	1	0	154.6	49	30	32	49	3	2	2	2	29.7
65	47	1	0	0	0	0	0	0	0	0	0	0	0	1	0	0	1	0	1	15	0	0	2	0	20/20	0	20/32	0.2	2	2	26	0	0	0	0	1	1	1	0	34.6	54	31	38	54	3	3	3	4	39.3
66	56	2	1	1	1	0	0	0	0	0	0	0	0	0	1	0	1	0	0	15	0	0	2	1	Hm	2.3	20/50	0.4	3	2	81	0	0	0	0	0	0	1	0	62	32	27	22	32	2	2	2	2	21.2
67	44	1	0	0	0	0	0	0	0	1	0	0	0	0	0	1	0	0	0	15	0	0	2	1	20/20	0	20/25	0.1	0	0	2	0	0	0	0	1	1	1	0	9.6	16	13	8	16	1	0	1	2	8.1
68	52	2	1	1	1	0	0	0	0	0	0	0	0	0	1	0	1	1	0	15	0	0	2	0	20/200	1	5/200	1.6	2	2	100	2	2	0	0	0	1	1	0	2.9	38	37	34	38	2	1	1	4	11.2
69	45	1	0	0	0	0	0	0	0	0	0	0	0	0	1	0	1	0	0	15	0	0	2	1	20/20	0	20/25	0.1	0	2	7	0	0	0	0	1	0	1	0	109.7	45	45	29	33	3	4	3	4	14.6
70	50	1	1	0	0	0	0	0	0	0	0	0	0	0	1	1	1	0	0	15	0	0	1	1	20/40	0.3	PL	2.7	2	3	76	0	0	0	0	1	1	1	0	36.9	48	33	34	48	3	3	2	3	22.9
71	51	2	0	0	0	0	0	0	0	0	0	0	0	0	0	0	1	0	0	15	0	0	2	1	15/200	1.1	20/160	0.9	2	2	100	0	0	0	0	1	1	1	0	42.9	37	23	25	37	2	1	2	4	22.4
72	49	2	0	0	0	0	0	0	0	0	0	0	0	0	1	0	1	0	0	15	0	0	1	0	20/40	0.3	HM	2.3	2	2	67	0	0	0	0	1	0	1	0	45	36				2	2	2	2	17.3
73	59	2	1	1	1	0	0	0	0	0	0	0	0	0	0	0	1	1	0	15	0	0	2	1	20/40	0.3	HM	2.3	2	2	69	1	0	0	0	0	0	1	0	72.2	28	28	25	26	1	3	2	2	16.2
74	48	2	0	0	0	0	0	0	0	0	0	0	0	0	0	0	1	0	0	15	0	0	2	1	20/40	0.3	20/32	0.2	2	2	39	0	0	0	0	0	0	0	0	19.5	25	25	18	22	1	1	1	2	11.3
75	46	2	0	0	0	0	0	0	0	0	0	0	0	0	1	0	1	0	0	15	0	0	2	0	FC	2	20/25	0.1	2	2	54	0	0	0	0	1	1	1	0	26.7	34	20	20	32	2	1	1	2	15
76	32	2	0	0	0	0	0	0	0	0	1	0	0	0	0	0	1	0	0	15	0	0	2	1	20/40	0.3	20/125	0.8	2	2	54	0	0	0	0	0	0	1	0	56.4	37	30	36	37	2	3	2	2	22.3
77	58	1	1	0	0	0	0	0	0	0	0	0	0	0	0	0	1	0	0	15	0	0	2	0	20/25	0.1	20/20	0	1	1	16	0	0	0	0	1	1	1	0	10.6	25	25	17	24	1	3	1	2	9.5
78	29	1	0	0	0	0	0	0	0	0	0	0	0	0	1	0	1	0	0	15	0	0	2	1	20/25	0.1	20/100	0.7	2	2	42	0	0	0	0	0	0	0	0	53.9	22	18	13	22	1	1	1	2	12
79	72	1	1	1	0	0	0	0	0	0	0	0	0	0	0	0	0	0	0	15	0	0	2	0	20/25	0.1	20/25	0.1	0	0	4	0	0	0	0	1	1	1	0	24.1	21	21	16	21	2	2	1	2	7
80	47	2	0	0	0	0	0	0	0	0	0	0	1	0	1	0	1	0	0	15	0	0	1	1	15/200	1.1	Hm	2.3	3	2	100	0	0	0	0	0	0	0	0	50.7	32	28	28	32	2	2	2	2	27.6
81	43	2	1	1	1	0	0	0	1	0	0	0	0	0	1	1	1	1	0	15	0	0	1	0	No PL	3	No PL	3	3	3	100	0	0	0	1	0	0	0	0	5.7	34	29	25	34	2	2	2	3	19.2
82	56	2	0	0	0	0	0	0	0	0	0	0	0	0	0	0	1	0	0	15	0	0	1	0	20/80	0.6	No PL	3	2	3	80	0	0	0	0	1	1	1	0	64.6	37	26	29	37	2	3	2	2	22.7
83	37	2	1	0	0	0	0	0	0	0	0	0	0	0	1	0	1	0	0	15	0	0	2	1	20/32	0.2	20/100	0.7	2	2	49	0	0	0	0	1	1	1	0	78.9	37	25	20	37	2	3	2	3	18.1
84	44	1	1	0	1	0	0	0	0	0	0	0	0	0	0	0	1	0	0	15	0	0	2	1	20/50	0.4	20/200	1	2	2	62	0	0	0	0	1	0	1	0	6.5	53	35	35	53	3	2	2	2	33.1
85	46	2	0	0	0	0	0	0	0	0	0	0	0	0	1	1	1	0	0	15	0	0	1	1	20/400	1.3	20/100	0.7	2	2	92	0	0	0	0	1	1	1	0	25.4	43	42	43	39	3	4	2	4	18.2
86	52	1	0	0	0	0	0	0	0	0	0	0	0	0	1	0	1	1	0	15	0	0	2	0	PL	2.7	HM	2.3	3	3	100	0	0	1	0	1	0	1	0	18	60	52	60	44	3	4	3	4	29.7
87	55	1	0	0	0	0	0	0	0	0	0	0	0	0	0	0	1	0	0	15	0	0	1	0	HM	2.3	20/400	1.3	3	2	100	0	0	0	0	1	1	1	0	22.5	35	30	24	35	2	2	2	3	20.9
88	54	2	0	0	0	0	0	0	0	0	0	0	0	0	0	0	1	0	0	15	0	0	2	1	No PL	3	20/63	0.5	3	2	72	0	0	0	0	1	1	1	0	110.3	39	24	28	39	2	3	2	3	24.2
89	63	1	0	0	0	0	0	0	0	0	0	0	1	0	0	0	1	0	0	15	0	0	2	1	20/50	0.4	10/200	1.3	2	2	69	0	0	0	0	0	0	0	0	5.8	25	21	25	21	1	2	2	2	18.3
90	26	1	0	0	0	0	0	0	0	1	0	0	0	0	1	0	1	0	0	15	0	0	1	0	20/50	0.4	FC	2	2	2	72	0	0	0	0	1	1	1	0	30.7	41	33	29	41	3	2	2	2	28.8
91	33	2	0	0	0	0	0	0	0	0	0	0	0	0	1	1	1	0	0	15	0	0	2	0		0.4		0.1	2	2	34	0	0	0	0	0	1	0	0	95.9	22	22	21	22	1	0	1	2	14.7
92	69	1	0	0	0	0	0	0	0	0	0	0	1	0	0	0	1	0	0	15	0	0	2	1		0.1		0.4	3	3	47	0	0	0	0	1	1		0	8.5	32	21	28	32	2	3	2	2	18.8
93	26	1	0	0	0	0	0	0	0	0	0	0	0	0	1	1	1	0	0	15	0	0	1	0	No PL	3	20/25	0.1	3	0	35	0	0	0	0	0	0		0	18.7	27	27	17	27	1	2	2	2	12.3
94	35	1	0	0	0	0	0	0	0	0	0	0	0	0	1	1	1	1	0	15	0	0	1	0		1		1.3	2	2	100	2	2	1	2	1	1	1	0	0.3	32	16	32	29	2	3	2	4	15.2
95	46	2	1	1	0	0	0	0	0	0	0	0	0	1	0	0	1	1	1	15	0	0	2	0		0.1		0.1	1	1	18	0	0	1	0	1	1	1	0	9.4	54	29	25	54	3	4	3	4	35.3
96	56	1	0	0	0	0	0	0	0	0	0	0	0	0	1	0	1	1	0	15	0	0	3	0		0.6		0	1	1	26	1	0	0	0	1	1	1	0	48.2	36	26	34	36	2	3	2	2	19.9
97	43	2	0	0	0	0	0	0	0	0	0	0	0	0	0	0	1	0	0	15	0	0	2	1		0.3		0.4	2	2	44	0	0	0	0	1	0	1	0	44.9	27	21	25	27	2	1	2	2	20.2
98	51	1	0	0	0	0	0	0	0	0	0	0	0	0	0	0	1	0	0	15	1	0	1	0		3		1.6	2	2	100	0	0	0	0	1	1	1	0	17.4	34	34	31	23	2	3	3	2	21.1
99	75	1	1	1	0	0	0	0	0	0	0	0		0	1	1	1	0	0	15	0	0		0	20/40 not related PA	0	20/125	0	0	0	0	0	0	0	0	0	0	0	0	16.47	9	9	9	7.6	0	0	0	1	0
100	61	2	1	0	0	0	0	0	0	0	0	0		0	1	0	1	0	0	15	0	0		0	20/25	0.1	20/25	0.1	0	0	4	0	0	0	0	0	0	0	0	5.02	9.7	9.7	9.7	5.59	0	0	0	1	0
101	44	2	0	0	0	0	0	0	0	0	0	0		0	1	0	1	0	0	15	0	0		0	20/32	0.2	20/25	0.1	0	0	8	0	0	0	0	0	0	0	0	8.63	16	16	7	6	1	0	0	1	0
102	74	1	1	1	0	0	0	0	0	0	0	0		0	1	0	1	0	0	15	0	0		0	20/32	0.2	20/40	0.3	0	0	17	2	0	0	0	0	0	0	0	3.05	21.8	21.8	9.4	14.4	1	1	1	1	3.96
103	79	2	1	1	0	0	0	0	0	0	0	0		0	1	0	1	0	0	15	0	0		0	20/200	1	FC	2	2	2	112	0	0	0	0	1	0	1	0	20.78	15.16	12.73	13.15	15.16	1	1	1	1	3.9
104	55	1	0	0	0	0	0	0	0	0	0	0		0	0	0	1	0	0	15	0	0		1	20/20	0	20/20	0	1	1	18	0	0	0	0	0	0	0	0	10.95	19.9	16.85	17.5	19.9	1	1	1	1	8.62
105	50	2	0	0	0	0	0	0	0	0	0	0		0	1	0	1	0	0	15	0	0		0	FC	2	HM	2.3	2	2	110	0	0	0	0	1	1	0	0	4.92	13	13.03	12.02	7.54	0	0	0	1	0
106	68	1	1	1	0	0	1	0	1	0	0	0		0	1	0	1	0	0	15	0	0		0	20/60	0.5	20/50	0.4	0	0	30	2	0	0	0	0	0	0	0	2.39	21	21.71	13.8	10.8	1	2	1	1	4.48
107	69	2	1	1	1	0	1	0	0	0	0	0		0	1	0	1	0	0	15	0	0		0	20/40	0.3	20/32	0.2	1	1	31	0	0	0	0	0	0	0	0	8.34	20	13.83	12.05	20.53	1	1	1	1	4.37
108	80	2	0	0	0	0	0	0	0	0	0	0		0	0	0	1	0	0	15	0	0		1	5/400	2	FC	2	2	2	100	0	0	0	0	0	0	0	0	107.2	21	16	21	12	1	1	1	1	2.06
109	22	2	0	0	0	0	0	0	0	0	0	0		0	0	0	1	0	0	15	0	0		0	20/25	0.1	20/32	0.2	0	0	8	0	0	0	0	0	0	0	0	11.65	18.07	16.25	14.69	18.07	1	0	1	2	2.27
110	73	1	0	0	0	0	0		0	0	0	0		0	1	0	1	0	0	15	0	0		0	No PL	3	No PL	3	3	3	100	1	0	0	0	1	1	1	0	12.32	9.84	9.84	9.34	9.66	0	0	0	1	0
111	59	1	1	0	0	0	0	0	1	0	0	0		0	1	1	1	0	0	15	0	0		0	20/200	1	20/100	0.7	2	2	82	0	0	0	0	1	0	1	0	4.18	17	15.35	17	17	1	1	1	1	6
112	57	1	1	0	0	0	1	0	1	0	0	0		0	1	0	1	0	0	15	0	0		0	20/400	1.3	HM	2.3	3	3	100	0	0	0	0	1	1	1	0	3.82	21.36	18.12	16.66	21.36	1	1	1	1	6.26
113	46	2	1	0	0	0	0	0	0	0	0	0		0	1	0	0	0	0	15	0	0		0	20/20	0	20/20	0	0	0	0	1	0	0	0	0	0	0	0	1396	20	20	19.51	16.8	1	2	0	1	5.55
114	88	1	0	0	0	0	0	0	0	0	0	0		0	1	1	1	0	0	15	0	0		0	20/160	0.9	HM	2.3	1	1	104	0	0	0	0	1	1	1	0	9.35	23	18.86	19.58	23	1	1	1	1	8
115	36	1	1	0	0	1	0	0	0	0	0	0		0	1	0	1	0	0	15	0	0		0	20/100	0.7	20/40	0.3	2	2	52	0	0	0	0	1	1	1	0	34.5	35	20.54	19.89	35.39	2	1	1	2	20.03
116	63	1	0	0	0	0	0	0	0	0	0	0		0	1	0	1	0	0	15	0	0		0	20/20	0	20/125	0.8	2	2	39	0	0	0	0	1	0	1	0	470	51	51.17	45.35	45.88	3	3	3	3	30
117	57	1	1	0	0	0	0	0	1	0	0	0		0	1	1	1	1	0	15	0	0		0	20/32	0.2	20/25	0.1	0	0	8	0	0	0	0	0	0	0	0	9.98	13	13	9	5	1	0	0	1	0
118	55	2	0	0	0	0	0	0	0	0	0	0		0	1	0	1	1	0	15	0	0		0	20/70	0.5	20/70	0.5	0	0	35	0	0	1	0	0	1	0	0	20.5	13	13	13	13	1	2	0	1	2.2
119	50	2	1	0	0	0	1	0	0	0	0	0		0	1	1	1	0	0	15	0	0		0	20/25	0.1	20/25	0.1	0	0	4	0	0	0	0	0	0	0	0	22	17	12	17	12	1	0	0	1	0
120	24	2	0	0	0	0	0	0	0	0	0	0		0	1	1	1	0	0	15	0	0		0	20/32	0.2	20/200	1	1	1	50	0	0	0	0	0	0	0	0	470	22	17	21	22	1	1	1	2	5.8
121	82	2	1	0	0	0	0	0	0	0	0	0		0	1	1	1	0	0	15	0	0		0	20/40	0.3	20/100	0.7	1	1	49	0	0	0	0	0	0	0	0	47.77	15	14	14	15	1	0	0	2	4.2
122	27	1	0	0	0	0	0	0	0	0	0	0		0	1	0	1	0	0	15	0	0		0	20/40	0.3	20/50	0.4	2	2	44	0	0	0	0	0	0	0	0	11.4	21	11	15	21	1	0	0	2	5.1
123	60	2	1	1	1	0	0	0	1	0	0	0		0	1	1	0	0	0	15	0	0		0	20/20	0	20/20	0	0	0	0	0	0	0	0	1	0	0	0	7.89	6	5	6	6	0	0	0	1	0
124	62	2	1	0	0	0	0	0	1	0	0	0		0	1	1	1	0	0	15	0	0		0	20/25	0.1	20/20	0	0	0	2	0	0	0	0	0	0	0	0	4.99	8	5	6	8	0	0	0	1	0
125	72	1	1	0	0	0	1	0	1	0	0	0		0	1	1	0	0	0	15	1	0		0	20/50	0.4	20/50	0.4	2	2	47	0	0	0	0	1	1	1	1	4.74	19	18	18	19	1	0	1	2	5.2
126	63	2	1	1	0	0	0	0	0	0	0	0		0	1	1	0	0	0	15	0	0	0	0	20/32	0.2	20/40	0.3	0	0	12	0	0	0	0	0	0	0	0	5.3	19	11	19	10	1	0	0	1	2
127	51	2	0	0	0	0		0	0	0	0	0		0	1	1	0	0	1	11	0	0		0								0	0	0	0	1	1	1	0	1.9	12	12	8	5	1
[truncated: 45 more columns]
