# Supplementary material for: Comparing Neuroendocrine Recovery Between Surgical and Conservative Management in Pituitary Apoplexy Patients: A Propensity Score-Matched Analysis
Source: Research Square preprint supplement (doi:10.21203/rs.3.rs-4160609/v1), 2024-03-29
Supplement: Supplementary file 2 [file e1508fe8ca960e92528df4af.docx]

**CRF: Comparing Neuroendocrine Recovery Between Surgical and Conservative Management in Pituitary Apoplexy Patients: A Propensity Score-Matched Analysis**

| 1. ID _ _ _ | ID **[ ] [ ] [ ]** |
| --- | --- |
| 1. Age _ _year | Age **[ ] [ ]** |
| 1. Gender  **□** 1=male **□** 2=female | Gender **[ ]** |
| 1. Underlying disease   4.1 Hypertension  **□** 0=no **□** 1= yes  4.2 DM  **□** 0=no **□** 1= yes  4.3 Underlying bleeding tendency  **□** 0=no **□** 1= yes  4.4 heart disease  **□** 0=no **□** 1= yes  4.5 DVT/PE  **□** 0=no **□** 1= yes  4.6 Antithrombotic medication  **□** 0=no **□** 1= yes  4.7 Previously known pituitary tumor  **□** 0=no **□** 1= yes  4.8 functioning pituitary  **□** 0=no **□** 1= yes  4.9 pregnancy  **□** 0=no **□** 1= yes | HT **[ ]**  DM **[ ]**  UBT **[ ]**  HD **[ ]**  DVT **[ ]**  ATM  **[ ]**  KPT **[ ]**  FP **[ ]**  PR **[ ]** |
| 1. Ventriculostomy/ VP shunt  **□** 0=no **□** 1= yes | VPO **[ ]** |
| 1. Clinical presentation   6.1 Headache  **□** 0=no **□** 1= yes  6.2 nausea/vomiting  **□** 0=no **□** 1= yes  6.3 Visual impairment  **□** 0=no **□** 1= yes  6.4 Cranial III-VI palsy  **□** 0=no **□** 1= yes  6.5 Alteration of consciousness  **□** 0=no **□** 1= yes  6.6 Preop Glasgow coma scale score _ _  6.7 Hypotension (SBP < 90 mmHg)  **□** 0=no **□** 1= yes  6.8 hemiparesis/other motor weakness  **□** 0=no **□** 1= yes | HEA **[ ]**  NV **[ ]**  VIM **[ ]**  CNP **[ ]**  AOC **[ ]**  GCS **[ ] [ ]**  HYP **[ ]**  HEMI **[ ]** |
| 1. Type of pituitary apoplexy  **□** 0=Clinical **□** 1=Subclinical | TOP **[ ]** |
| 1. Pre-op VA deficit (logMAR):    1. Right eye (Snellen fraction _ _ _ /_ _ _)    2. Left eye (Snellen fraction _ _ _ /_ _ _) | RPA **[ ] [ ]**  LPA  **[ ] [ ]** |
| 1. Pre-op VF defect 2. Right eye  **□** 0= No **□** 1= Quadrantanopia **□** 2= Hemianopia  **□** 3= Blind 3. Left eye  **□** 0= No **□** 1= Quadrantanopia **□** 2= Hemianopia  **□** 3= Blind | RPF **[ ]**  LPF **[ ]** |
| 1. Visual Impairment Score (VIS) _ _ | VIS **[ ] [ ]** |
| 1. Cranial nerve 2. CN.III  **□** 0= Normal **□** 1= Incomplete palsy **□** 2= Complete palsy 3. CN.IV  **□** 0= Normal **□** 1= Incomplete palsy **□** 2= Complete palsy 4. CN.V  **□** 0= Normal **□** 1= Incomplete palsy **□** 2= Complete palsy 5. CN.VI  **□** 0= Normal **□** 1= Incomplete palsy **□** 2= Complete palsy | C3P **[ ]**  C4P **[ ]**  C5P **[ ]**  C6P **[ ]** |
| 1. Pre-op pituitary function    1. Hypoadrenalism  **□** 0=no **□** 1= yes    2. Hypothyroidism  **□** 0=no **□** 1= yes    3. Hypogonadism  **□** 0=no **□** 1= yes    4. Diabetes insipidus  **□** 0=no **□** 1= yes    5. Serum Prolactin level _ _ _ | PHA **[ ]**  PHT **[ ]**  PHG **[ ]**  PDI **[ ]**  PSP **[ ][ ][ ]** |
| 1. Imaging characteristics    1. Tumor size _ _._ _millimeter    2. Width _ _._ _millimeter    3. Length _ _._ _millimeter    4. Height _ _._ _millimeter    5. Tumor classified  **□** 0=1=micro(<1cm) **□** 1= macro(1-3cm)  **□** 2=large(3-4 cm) **□** 3=giant(>4cm) | PTS **[ ][ ] . [ ][ ]**  PW **[ ][ ] . [ ][ ]**  PL **[ ][ ] . [ ][ ]**  PH **[ ][ ] . [ ][ ]**  TC **[ ]** |
| 1. Knops classification (0-4)   **□** 0= Tumors are confined within a line tangent to the medial aspects of both the supracavernous and intracavernous carotid arteries  **□** 1= Tumors are confined within a line tangent to the medial aspects of both the supracavernous and intracavernous carotid arteries  **□** 2= Tumors extend past the intercavernous line but stay within the line tangent to the supracavernous and intracavernous carotid arteries  **□** 3= Tumors spread lateral to the lateral tangent line.  **□** 4= Tumors totally encase the intracavernous carotid artery | KNO **[ ]** |
| 1. Wilson-Hardy suprasellar extension   **□** 0= none  **□** 1= A: expanding into suprasellar cistern  **□** 2= B: anterior recesses of 3rd ventricle obliterated  **□** 3= C: floor of 3rd ventricle grossly displaced | WIE **[ ]** |
| 1. Wilson-Hardy inferior invasion   **□** 1= sella normal or focally expanded; tumor < 10mm  **□** 2= sella enlarged; tumor ≥ 10mm  **□** 3= localized perforation of sella floor  **□** 4= diffuse destruction of sella floor | WII **[ ]** |
| 1. Suprasellar extension of lesion _ _ . _ _millimeter | SSE  **[ ]** |
| 1. Signal change within optic nerves or chiasm  **□** 0=no **□** 1= yes | SCO **[ ]** |
| 1. Treatment  **□** 0= conservative **□** 1= surgery | TRE **[ ]** |
| 1. Surgical treatment    1. Technique  **□** 1= Microsurgical **□** 2= Endoscopic    2. Timing of surgical intervention after onset _ _ _ day    3. Complete macroscopic resection   **□** 0= total tumor removal  **□** 1= only cavernous sinus  **□** 2= near total tumor removal (>90%)  **□** 3= residual  20.4 Intra-op hematoma consistency **□** 1=fluid **□** 2= blood clot  **□** 3= fibrous | SAP **[ ]**  TSI **[ ] [ ] [ ]**  CTR **[ ]**  IHC **[ ]** |
| 1. Additional treatment **□** 0=no **□** 1= Re-surgery **□** 2= Radiation **□** 3=combined | ATR **[ ]** |
| 1. Post-op VA    1. Right  **□** 1= Deterioration/ Stable **□** 2= Partial recovery  **□** 3=Recovery Full recovery **□** 9= no pre-op deficit    2. Left  **□** 1= Deterioration/ Stable **□** 2= Partial recovery  **□** 3=Recovery Full recovery **□** 9= no pre-op deficit | RAR **[ ]**  LAR **[ ]** |
| 1. Post-op VF    1. Right  **□** 1= Deterioration/ Stable **□** 2= Partial recovery  **□** 3=Recovery Full recovery **□** 9= no pre-op deficit    2. Left  **□** 1= Deterioration/ Stable **□** 2= Partial recovery  **□** 3=Recovery Full recovery **□** 9= no pre-op deficit | RFR  **[ ]**  LFR **[ ]** |
| 1. Post-op CN.III  **□** 1= Deterioration/ Stable **□** 2= Partial recovery  **□** 3=Recovery Full recovery | C3R **[ ]** |
| 1. Post-op CN.IV  **□** 1= Deterioration/ Stable **□** 2= Partial recovery  **□** 3=Recovery Full recovery | C4R **[ ]** |
| 1. Post-op CN.V  **□** 1= Deterioration/ Stable **□** 2= Partial recovery  **□** 3=Recovery Full recovery | C5R **[ ]** |
| 1. Post-op CN.VI  **□** 1= Deterioration/ Stable **□** 2= Partial recovery  **□** 3=Recovery Full recovery | C6R **[ ]** |
| 1. Post-op hormone    1. Hypoadrenalism  **□** 1=New deficit **□** 2=Stable  **□** 3=Recovery    2. Hypothyroidism  **□** 1=New deficit **□** 2=Stable  **□** 3=Recovery    3. Hypogonadism  **□** 1=New deficit **□** 2=Stable  **□** 3=Recovery    4. Permanent DI  **□** 1=New deficit **□** 2=Stable  **□** 3=Recovery | HAR **[ ]**  HTR **[ ]**  HGR **[ ]**  DIR **[ ]** |
| 1. Post-op complication    1. CSF leakage  **□** 0=no **□** 1= yes    2. Meningitis  **□** 0=no **□** 1= yes    3. Injury to optic apparatus  **□** 0=no **□** 1= yes    4. Epitaxis  **□** 0=no **□** 1= yes    5. Anosmia  **□** 0=no **□** 1= yes    6. Sinonasal problems  **□** 0=no **□** 1= yes    7. SIADH  **□** 0=no **□** 1= yes    8. ICA injury  **□** 0=no **□** 1= yes    9. Re-operation  **□** 0=no **□** 1= yes | POC **[ ]**  POM **[ ]**  POI **[ ]**  POE **[ ]**  POA **[ ]**  POSP **[ ]**  POSI **[ ]**  POII **[ ]**  POR **[ ]** |
| 1. Duration of F/U _ _ month | DFU **[ ][ ]** |
| 1. Recurrence or enlarge(imaging) **□** 0=no **□** 1= yes   -The first postoperative MRI was performed within 3 months of the initial surgery. Gross total removal was defined as no visible remnant tumor or membrane on first postoperative MRI.  -Tumor recurrence during follow-up was defined as either the appearance of a pathologic lesion on MRI that was not previously detected or the growth of tumor residuals. | ROE **[ ]** |
| 1. Postop imaging    1. residual tumor in cavernous sinus **□** 0=no **□** 1= yes    2. residual tumor in suprasellar cistern **□** 0=no **□** 1= yes | RTC **[ ]**  RTS  **[ ]** |
| 1. Tumor shrinkage  **□** 0=no **□** 1= yes | TS **[ ]** |
| 1. Postop MRS at 6 months   **□** 0= No symptoms at all  **□** 1= No significant disability despite symptoms; able to carry out all usual duties and activities  **□** 2= Slight disability; unable to carry out all previous activities, but able to look after own affairs without assistance  **□** 3= Moderate disability; requiring some help, but able to walk without assistance  **□** 4= Moderately severe disability; unable to walk without assistance and unable to attend to own bodily needs without assistance  **□** 5= Severe disability; bedridden, incontinent and requiring constant nursing care and attention  **□** 6= Dead | POMRS **[ ]** |
